# Supplementary material
Source: PubMed Central journal article supplement (PMC3307312)
Supplement: supp_M111.283119_supplem_283119-9820_new.pdf [file supp_M111.283119_supplem_283119-9820_new.pdf]

## LEGENDS for SUPPLEMENTARY FIGURES and TABLES

**FIGURE S1.** Detailed data derived from wild type and integrin deficient female mice at 1 and 3 months. (A) Femoral length, (B) cortical bone mineral density and (C) cortical thickness (assessed by pQCT), (D) ultimate load and (E) stiffness (assessed by three-point bending test) were significantly reduced in  $\alpha 2\beta 1 + \alpha 11\beta 1$  double deficient (dko) mice. \*significant difference to wt ( $p < 0.05$ ), †significant difference to  $\alpha 2$  ko ( $p < 0.05$ ), #significant difference to  $\alpha 11$  ko ( $p < 0.05$ ). (F, G) reduced body length and (H, I) body mass in integrin mutants. (J,K) reduced IGF-1 and (L,M) IGFBP3 levels in sera of integrin deficient mice. \*,  $p < 0.05$ ; \*\*,  $p < 0.005$ ; \*\*\*,  $p < 0.0005$ .

**FIGURE S2.** Analyses of osteoblast cultures: Expression of integrin subunits, alkaline phosphatase activity and proliferation. (A) Primary calvarial osteoblasts were cultured as described in Methods and in legend to Fig. 3. Integrin  $\alpha 2$  expression increased with late differentiation, while  $\alpha 11$  transcripts did not change markedly. S26 transcript levels reflected similar amounts of template. (B) Alkaline Phosphatase activity and (C) osteoblast proliferation assessed by formazan production did not differ significantly between wild type and integrin deficient cells. Please note that high standard deviations arise from combining results of independent experiments.

**FIGURE S3.** IGF-1 signaling and growth hormone (GH) levels. (A,B) Western blot analysis of protein kinase AKT and phosphorylated (p)AKT (Ser437) in cell lysates of primary fibroblasts (A) and primary osteoblasts (B) were performed to test whether integrin-deficient cells were capable of responding to IGF-1 stimulation in vitro. Regardless of genotype, similar levels of pAKT were detected after stimulation with recombinant IGF-1 (5ng/ml) or 200nM insulin (INS) for 10 minutes. (C) GH levels were assessed in the serum of 6 weeks old wild type and double deficient (dko) mice using a rat/mouse growth hormone ELISA kit (Millipore). In both female and male mice, GH serum levels were decreased in mice lacking  $\alpha 2\beta 1 + \alpha 11\beta 1$  integrins. \*,  $p < 0.05$ .

**FIGURE S4.** Hypothalamic expression of GnRH, TRH, CRH and somatostatin. Real time analysis of mRNA expression of gonadotropin-releasing hormone (GnRH), thyrotropin-releasing hormone (TRH), corticotropin-releasing hormone (CRH) and somatostatin in the hypothalamus revealed no significant differences between wild type and integrin deficient mice.

**TABLE S1.** Trabecular properties of femurs (pQCT). Trabecular bone parameters were measured at the age of one and three months. In contrast to cortical parameter, only  $\alpha 2\beta 1 + \alpha 11\beta 1$  deficient animals showed significant alterations at one month, not being persistent until adulthood.

**TABLE S2.** Mechanical properties of femurs (3-point bending test). In addition to maximal applied load and bone stiffness, further parameters were assessed employing 3-point bending tests. Energy as well as the bending moment was significantly altered in double deficient (dko) animals, while other parameters such as elastic modulus remained unchanged.

**TABLE S3.** Metabolic parameters. Metabolic parameters such as dioxygen consumption, carbon dioxide production as well as heat production were evaluated by indirect calorimetry, revealing similar respiratory exchange rates in integrin deficient animals when compared to wild type controls.  $n = 6$  per genotype.

## SUPPLEMENTARY METHODS

*Cell culture-* Primary fibroblasts were isolated from trunk skin of newborn animals and cultured as described (18). Primary chondrocytes were isolated from from rib cages of 1-4 day old mice as described previously (Budde et al., 2005).

*RT-PCR-* Total RNA was extracted from osteoblasts using RNeasy (Qiagen). Expression of  $\alpha 2$  and  $\alpha 11$  integrin subunits was detected by RT-PCR using the following primers:  $\alpha 2$  forward 5'GCA-CCA-CAT-TAG-CAT-ACA-GA3',  $\alpha 2$  reverse 5'GGC-ATC-ATA-CAG-GAG-AGG-AA3',  $\alpha 11$  forward 5'CCG-CCT-TCC-TCT-GCT-TCA-TAC-CCA-T3',  $\alpha 11$  reverse 5'GCC-GCC-TCT-CCT-CGT-TCA-CAC-ACT-C3'. S26 forward 5'AAT-GTG-CAG-CCC-ATT-CGC-TG3', S26 reverse 5'CTT-CCG-TCC-TTA-CAA-AAC-GG3'.

*Determination of phosphatase activity and proliferation-* Osteoblasts were seeded in microwell plates at  $10^4/\text{cm}^2$  and cultured in presence of 10 mM phosphoglycerate and 5mM phosphoascorbate to induce osteogenic differentiation and mineralization (day 0) for up to 18 days. At days 4, 7, 11, 14 and 18, alkaline phosphatase activity of triplicate cultures was determined as described (57). Proliferation of primary calvarial osteoblasts was monitored in a tetrazolium-based assay (CellTiter 96 Aqueous One Solution Cell Proliferation Assay, Promega).

*Western blot analysis-* For detection of pAKT (Ser473), cells were stimulated with IGF-1 (5 ng/ml, Sigma) or insulin (200nM, Sigma) for 10 minutes prior to extraction in RIPA buffer (150 mM NaCl, 50 mM Tris-HCl, 1 % NP-40, 0.1 % SDS, 0.5 % Na-deoxycholate, 5 mM EDTA, 1 % Triton X-100, pH 8), supplemented with protease and phosphatase inhibitor cocktails (Sigma-Aldrich). Proteins were separated by SDS-PAGE and transferred to Hybond C extra membranes (Amersham Biosciences). Following blocking (5 % milk powder in TBS-T, pH 7.6), membranes were incubated with primary antibodies directed against AKT and pAKT (both 1:1000, Cell Signaling). Secondary HRP-conjugated antibodies were purchased from Dako. Signals were detected by chemiluminescence using Western Lightning (Perkin Elmer) or SuperSignal West Femto (Thermo Scientific).

*Determination of circulating growth hormone (GH) levels-* Blood collected by venous puncture was centrifuged (1000 x g, 30 min at 4°C). Plasma was collected, stored at -80°C, and GH levels were analyzed using a rat/mouse growth hormone ELISA kit (Millipore) according to the manufacturer's protocol.

*qRT-PCR-* cDNA was generated using a High-Capacity cDNA reverse transcription kit (Applied Biosystems) and amplified using TaqMan Universal PCR Master Mix, No AmpErase UNG with TaqMan Assay-on-Demand kits for GnRH, TRH, CRH, somatostatin, glucuronidase  $\beta$  and HPRT (Applied Biosystems). qPCR was performed as described in Experimental Procedures Section.

*Analyses of metabolic parameters-* Oxygen consumption, carbon dioxide production as well as heat production were measured by indirect calorimetry and the respiratory exchange rate (RER) was calculated by the ratio between  $\text{CO}_2 / \text{O}_2$  consumption.

Figure S1

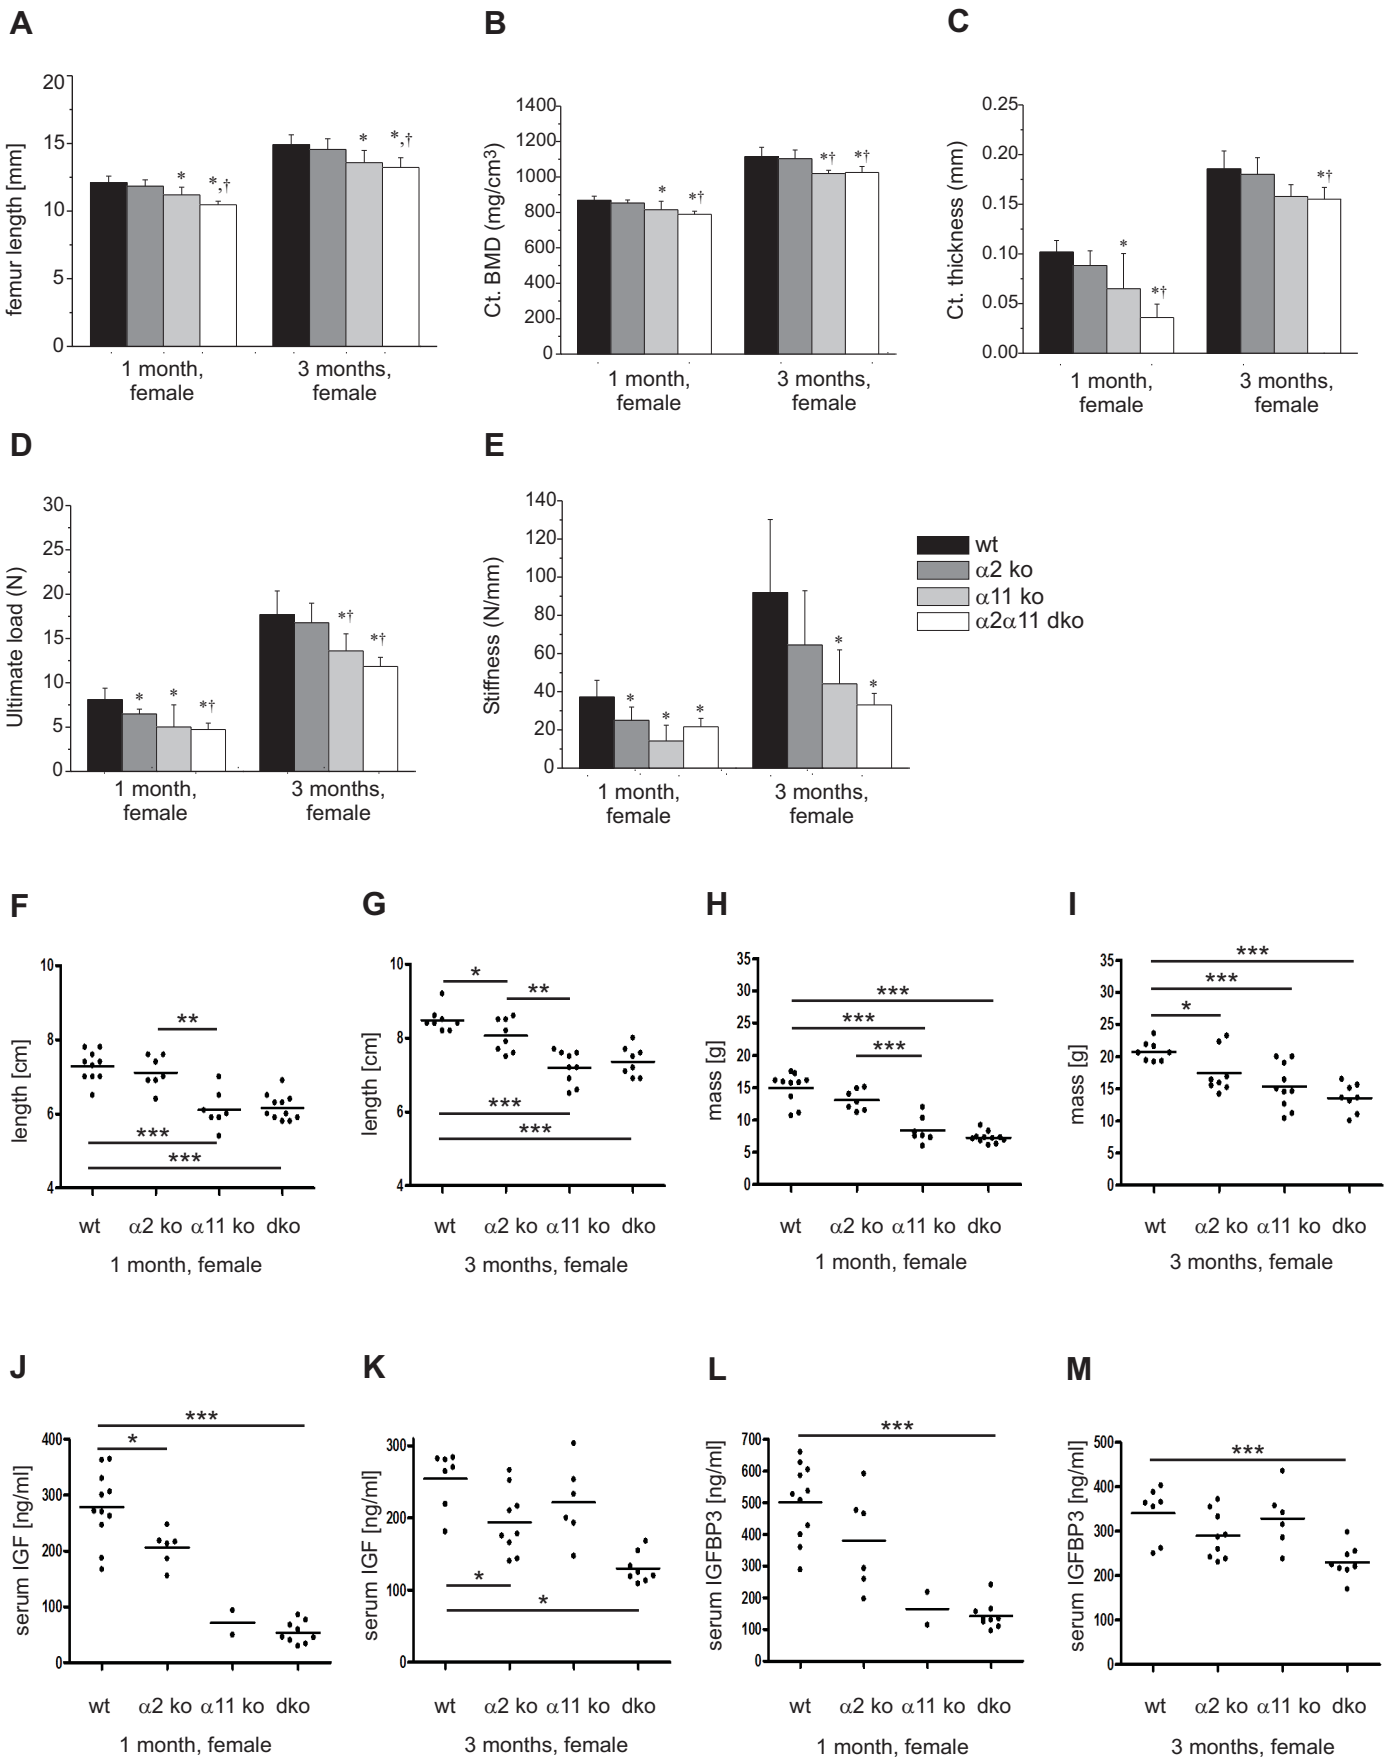

# Figure S2

**A**

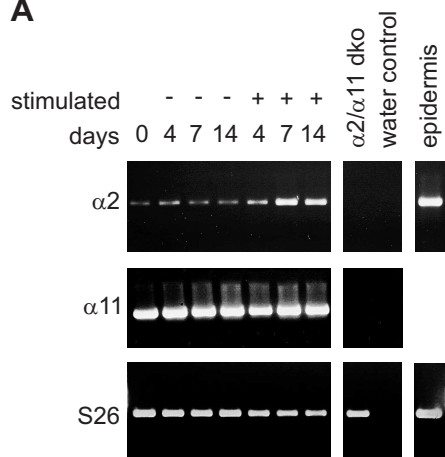

**B**

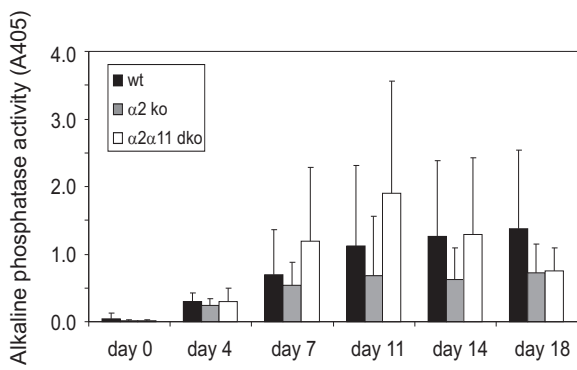

**C**

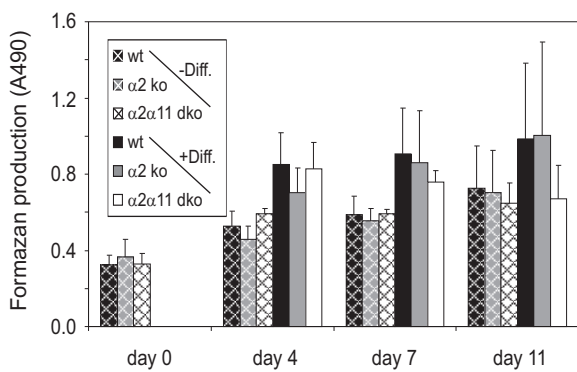

Figure S3

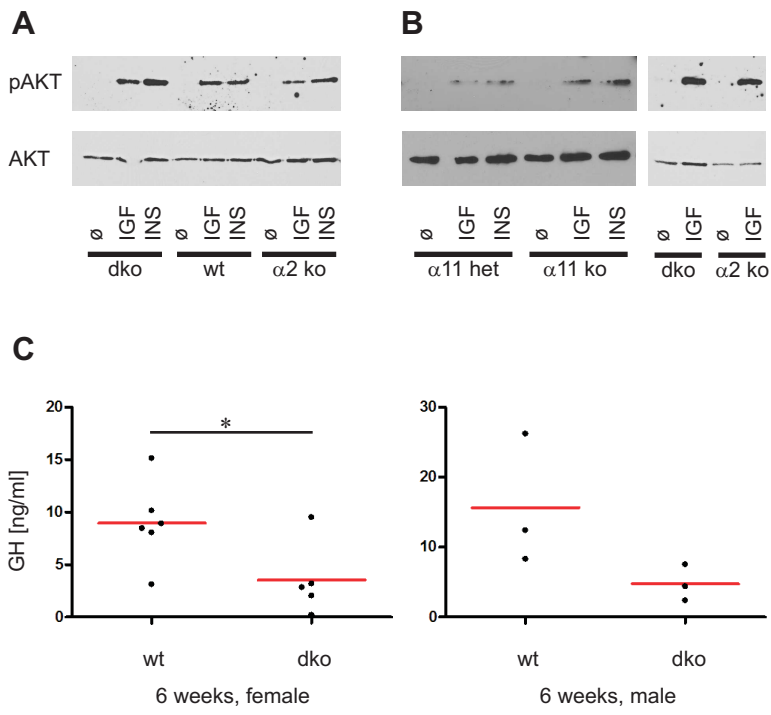

# Figure S4

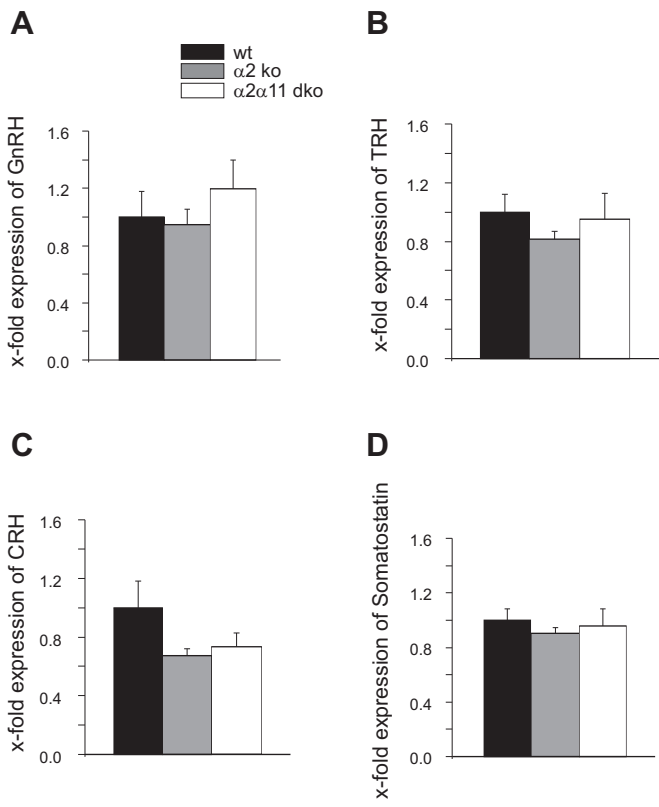

Table S1. Trabecular properties of femurs (pQCT).

|                              | wt          | $\alpha 2$ ko | $\alpha 11$ ko        | $\alpha 2\alpha 11$ dko    |
|------------------------------|-------------|---------------|-----------------------|----------------------------|
| 1 month males                |             |               |                       |                            |
| BMD (mg/cm <sup>3</sup> )    | 389 ± 10    | 367 ± 23      | 373 ± 14              | 323 ± 28 <sup>*,†,#</sup>  |
| Tb.BMD (mg/cm <sup>3</sup> ) | 265 ± 11    | 247 ± 31      | 271 ± 13              | 207 ± 42 <sup>*,†,#</sup>  |
| BMC (mg)                     | 1.54 ± 0.08 | 1.40 ± 0.12   | 1.46 ± 0.06           | 1.22 ± 0.21 <sup>*,#</sup> |
| Tb.BMC (mg)                  | 0.32 ± 0.02 | 0.28 ± 0.04   | 0.32 ± 0.01           | 0.24 ± 0.06 <sup>*,#</sup> |
| CSA (mm <sup>2</sup> )       | 3.96 ± 0.17 | 3.80 ± 0.16   | 3.92 ± 0.12           | 3.74 ± 0.35                |
| Tb.CSA (mm <sup>2</sup> )    | 1.19 ± 0.05 | 1.14 ± 0.05   | 1.18 ± 0.04           | 1.12 ± 0.10                |
| 3 months males               |             |               |                       |                            |
| BMD (mg/cm <sup>3</sup> )    | 481 ± 40    | 455 ± 48      | 445 ± 60              | 450 ± 47                   |
| Tb.BMD (mg/cm <sup>3</sup> ) | 227 ± 25    | 203 ± 51      | 221 ± 63              | 222 ± 42                   |
| BMC (mg)                     | 1.95 ± 0.28 | 1.75 ± 0.36   | 1.69 ± 0.25           | 1.65 ± 0.31                |
| Tb.BMC (mg)                  | 0.28 ± 0.04 | 0.24 ± 0.08   | 0.26 ± 0.07           | 0.25 ± 0.06                |
| CSA (mm <sup>2</sup> )       | 4.03 ± 0.41 | 3.80 ± 0.41   | 3.78 ± 0.17           | 3.63 ± 0.46                |
| Tb.CSA (mm <sup>2</sup> )    | 1.21 ± 0.12 | 1.14 ± 0.12   | 1.14 ± 0.05           | 1.09 ± 0.14                |
| 1 month females              |             |               |                       |                            |
| BMD (mg/cm <sup>3</sup> )    | 383 ± 17    | 348 ± 31      | 344 ± 20              | 319 ± 29 <sup>*</sup>      |
| Tb.BMD (mg/cm <sup>3</sup> ) | 263 ± 20    | 223 ± 41      | 238 ± 8               | 203 ± 33 <sup>*</sup>      |
| BMC (mg)                     | 1.50 ± 0.10 | 1.32 ± 0.17   | 1.31 ± 0.12           | 1.16 ± 0.19 <sup>*</sup>   |
| Tb.BMC (mg)                  | 0.31 ± 0.03 | 0.26 ± 0.05   | 0.28 ± 0.02           | 0.23 ± 0.05 <sup>*</sup>   |
| CSA (mm <sup>2</sup> )       | 3.93 ± 0.19 | 3.79 ± 0.30   | 3.79 ± 0.13           | 3.61 ± 0.32                |
| Tb.CSA (mm <sup>2</sup> )    | 1.18 ± 0.06 | 1.14 ± 0.09   | 1.14 ± 0.04           | 1.08 ± 0.10                |
| 3 months females             |             |               |                       |                            |
| BMD (mg/cm <sup>3</sup> )    | 451 ± 37    | 450 ± 30      | 413 ± 18 <sup>*</sup> | 409 ± 21 <sup>*,†</sup>    |
| Tb.BMD (mg/cm <sup>3</sup> ) | 154 ± 25    | 167 ± 49      | 170 ± 13              | 178 ± 35                   |
| BMC (mg)                     | 1.60 ± 0.15 | 1.57 ± 0.17   | 1.42 ± 0.19           | 1.39 ± 0.17                |
| Tb.BMC (mg)                  | 0.17 ± 0.03 | 0.18 ± 0.06   | 0.18 ± 0.02           | 0.19 ± 0.05                |
| CSA (mm <sup>2</sup> )       | 3.55 ± 0.18 | 3.48 ± 0.19   | 3.42 ± 0.36           | 3.39 ± 0.32                |
| Tb.CSA (mm <sup>2</sup> )    | 1.07 ± 0.05 | 1.05 ± 0.06   | 1.03 ± 0.11           | 1.02 ± 0.10                |

Values are mean ± SD

\*significant difference to wt (p < 0.05)

†significant difference to  $\alpha 2$  ko (p < 0.05)

#significant difference to  $\alpha 11$  ko (p < 0.05)

Table S2. Mechanical properties of femurs (3-point bending test).

|                       | wt           | $\alpha 2$ ko | $\alpha 11$ ko | $\alpha 2\alpha 11$ dko |
|-----------------------|--------------|---------------|----------------|-------------------------|
| 1 month males         |              |               |                |                         |
| Deformation (mm)      | 0.50 ± 0.05  | 0.47 ± 0.06   | 0.52 ± 0.11    | 0.46 ± 0.08             |
| Energy (mJ)           | 3.0 ± 0.4    | 2.2 ± 0.4 *   | 2.8 ± 0.8      | 1.4 ± 0.4 *,†,#         |
| Bending moment (Nmm)  | 11.1 ± 1.6   | 8.6 ± 1.2 *   | 9.3 ± 1.2      | 5.9 ± 1.4 *,†,#         |
| Ultimate stress (MPa) | 61.9 ± 8.8   | 58.6 ± 4.1    | 58.0 ± 5.4     | 55.8 ± 9.7              |
| Strain                | 0.16 ± 0.01  | 0.14 ± 0.02   | 0.16 ± 0.03    | 0.12 ± 0.02 *,#         |
| Elastic modulus (GPa) | 0.40 ± 0.06  | 0.44 ± 0.08   | 0.39 ± 0.14    | 0.45 ± 0.07             |
| 3 months males        |              |               |                |                         |
| Deformation (mm)      | 0.43 ± 0.11  | 0.44 ± 0.12   | 0.54 ± 0.14    | 0.41 ± 0.11             |
| Energy (mJ)           | 6.1 ± 1.7    | 5.2 ± 2.0     | 5.4 ± 1.1      | 3.9 ± 1.4 *             |
| Bending moment (Nmm)  | 28.9 ± 5.2   | 24.0 ± 4.0 *  | 21.9 ± 2.1 *   | 20.0 ± 4.4 *            |
| Ultimate stress (MPa) | 104.7 ± 17.6 | 101.2 ± 8.8   | 91.1 ± 5.8     | 101.0 ± 18.4            |
| Strain                | 0.14 ± 0.04  | 0.14 ± 0.04   | 0.17 ± 0.04    | 0.12 ± 0.04             |
| Elastic modulus (GPa) | 0.81 ± 0.31  | 0.80 ± 0.27   | 0.55 ± 0.12    | 0.92 ± 0.40             |
| 1 month females       |              |               |                |                         |
| Deformation (mm)      | 0.48 ± 0.07  | 0.46 ± 0.05   | 0.42 ± 0.06    | 0.43 ± 0.09             |
| Energy (mJ)           | 2.6 ± 0.6    | 2.0 ± 0.4     | 1.4 ± 0.8 *    | 1.3 ± 0.4 *             |
| Bending moment (Nmm)  | 10.1 ± 1.6   | 8.1 ± 0.7 *   | 6.3 ± 3.1 *    | 5.9 ± 0.9 *,†           |
| Ultimate stress (MPa) | 61.8 ± 9.3   | 61.0 ± 7.0    | 40.8 ± 16.4    | 60.3 ± 13.1             |
| Strain                | 0.14 ± 0.02  | 0.13 ± 0.01   | 0.13 ± 0.02    | 0.12 ± 0.02             |
| Elastic modulus (GPa) | 0.44 ± 0.06  | 0.49 ± 0.09   | 0.32 ± 0.09    | 0.54 ± 0.17             |
| 3 months females      |              |               |                |                         |
| Deformation (mm)      | 0.40 ± 0.07  | 0.39 ± 0.07   | 0.44 ± 0.08    | 0.42 ± 0.12             |
| Energy (mJ)           | 4.7 ± 1.1    | 3.7 ± 0.5     | 3.8 ± 0.8      | 2.9 ± 0.8 *             |
| Bending moment (Nmm)  | 22.1 ± 3.3   | 21.0 ± 2.8    | 17.0 ± 2.4 *,† | 14.8 ± 1.3 *,†          |
| Ultimate stress (MPa) | 99.1 ± 14.9  | 104.1 ± 4.6   | 89.2 ± 16.9    | 90.4 ± 15.3             |
| Strain                | 0.12 ± 0.02  | 0.12 ± 0.02   | 0.13 ± 0.03    | 0.12 ± 0.03             |
| Elastic modulus (GPa) | 0.83 ± 0.25  | 0.90 ± 0.13   | 0.71 ± 0.24    | 0.81 ± 0.31             |

Values are mean ± SD

\*significant difference to wt (p < 0.05)

†significant difference to  $\alpha 2$  ko (p < 0.05)

#significant difference to  $\alpha 11$  ko (p < 0.05)

Table S3. Metabolic parameters.

|                                      | wt           | $\alpha 2$ ko | $\alpha 11$ ko | $\alpha 2\alpha 11$ dko |
|--------------------------------------|--------------|---------------|----------------|-------------------------|
| O <sub>2</sub> consumption (ml/h/kg) | 2700 ± 244   | 3076 ± 411    | 3246 ± 788     | 2857 ± 397              |
| CO <sub>2</sub> production (ml/h/kg) | 2447 ± 193   | 2738 ± 445    | 2925 ± 774     | 2599 ± 423              |
| Heat production (kcal/h/kg)          | 13.35 ± 1.16 | 15.15 ± 2.10  | 16.03 ± 3.96   | 14.13 ± 2.02            |
| Respiratory exchange rate (RER)      | 0.91 ± 0.04  | 0.89 ± 0.04   | 0.89 ± 0.03    | 0.91 ± 0.04             |
